# Supplementary material for: A Field Screening of a Pomegranate (Punica granatum) Ex-Situ Germplasm Collection for Resistance against the False Spider Mite (Tenuipalpus punicae)
Source: MDPI journal article supplement (doi:10.3390/agriculture12101686), 2022-10-13
Supplement: s1 [file s1]

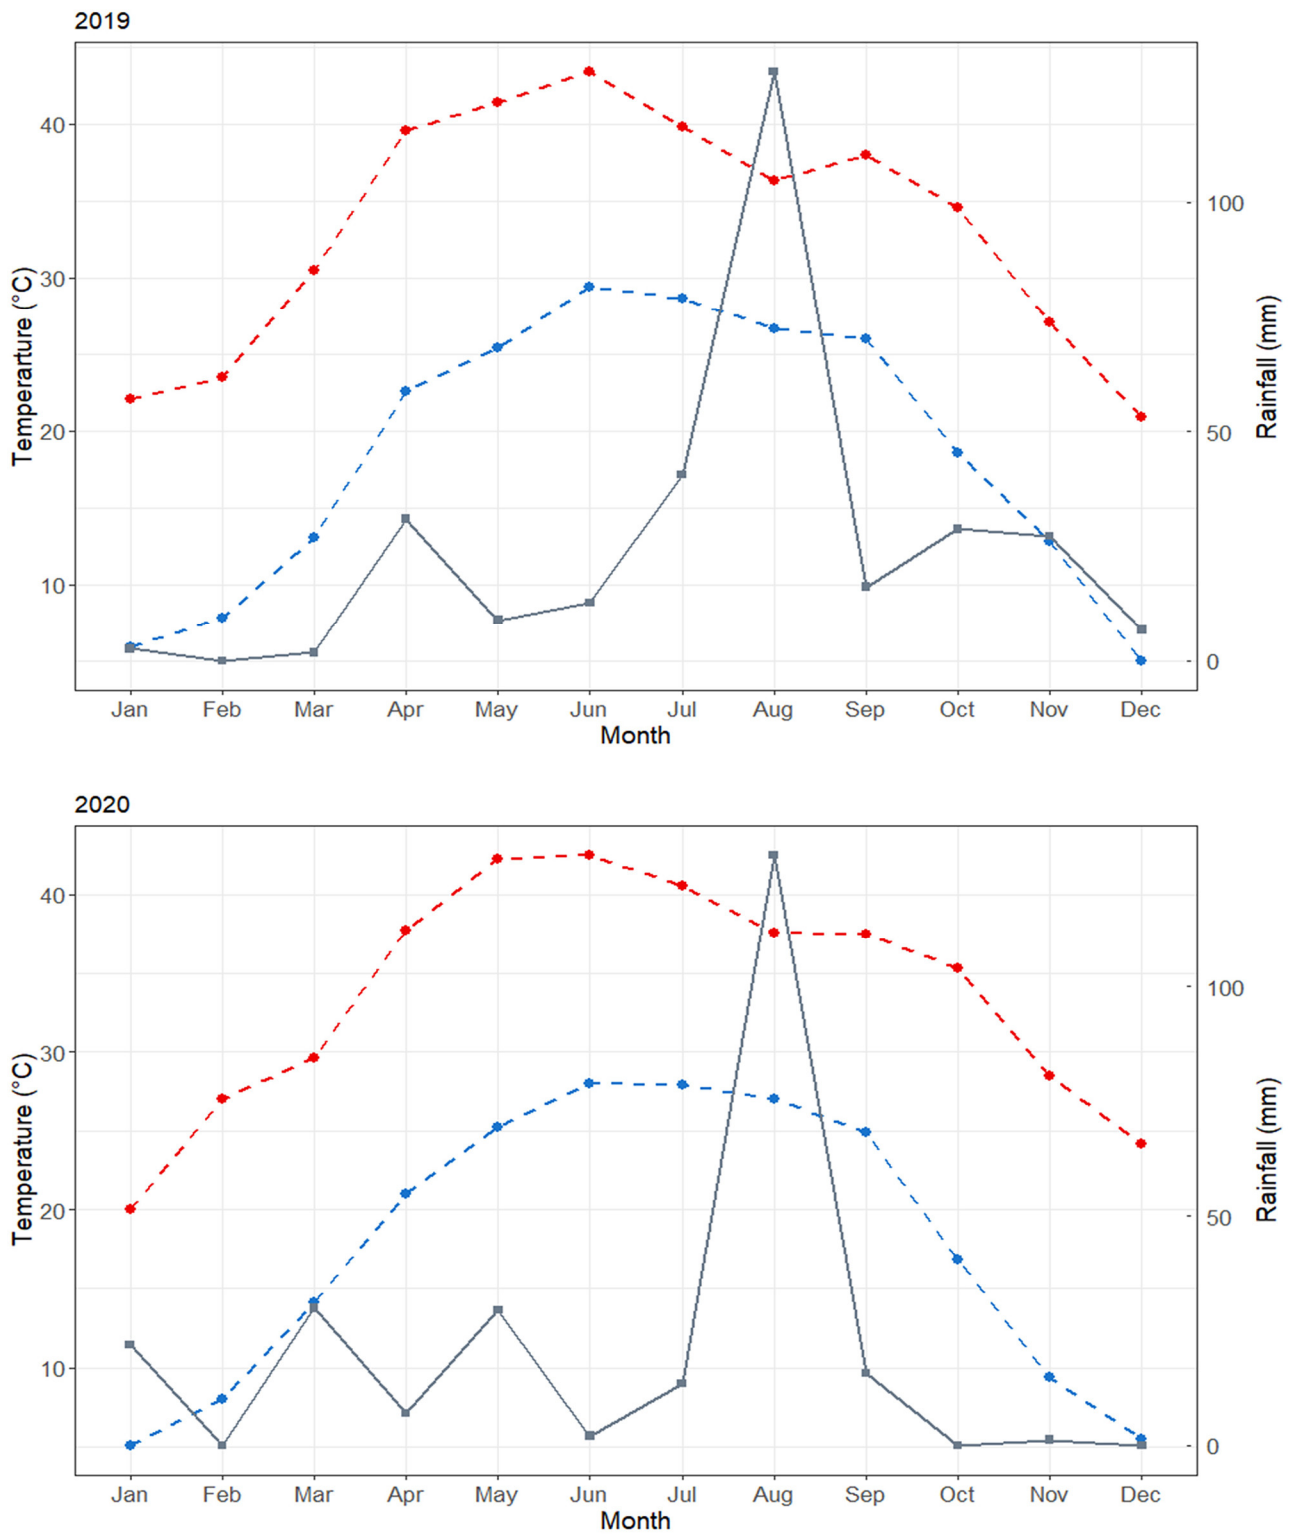

**Supplementary Figure S1.** Climate charts. Average maximum (red line) and minimum (blue line) monthly temperature (dashed lines) in °C and monthly rainfall (continuous grey line) in mm during 2019 and 2020.

**Supplementary Table S1.** Pomegranate accession collection available at the experimental station of ICAR-Central Institute for Arid Horticulture (Bikaner, India) and their source of collection.

| Accession            | Source*  |
|----------------------|----------|
| A K Anar             | MPKV     |
| Achik Dana           | NBPGR-JR |
| Agah                 | MPKV     |
| AHPG-C1              | CIAH-BR  |
| AHPG-C3              | CIAH-BR  |
| AHPG-C4              | CIAH-BR  |
| AHPG-H1              | CIAH-BR  |
| AHPG-H2              | CIAH-BR  |
| AHPG-H3              | CIAH-BR  |
| AHPG-H4              | NBPGR-ND |
| Alah                 | MPKV     |
| Banaras collect.     | BHU      |
| Basin Seedless       | CAZRI    |
| Basin Seedling       | RBS      |
| Bedana Sedana        | NBPGR-ND |
| Bedana Suri          | MPKV     |
| Bedana Thin Skin     | MPKV     |
| Bhagwa Boseka Link   | MPKV     |
| Coimb. White         | MPKV     |
| Crenedo de Elecho    | MPKV     |
| Dholka               | MPKV     |
| Dorsata Malus        | MPKV     |
| EC-12613             | NBPGR-ND |
| EC-62812             | NBPGR-ND |
| G-137                | MPKV     |
| Ganesh               | MPKV     |
| GKVK-1               | CAZRI    |
| Goma Khatta          | CIAH-VJ  |
| Gul e Shah           | MPKV     |
| Gul e Shah Red       | MPKV     |
| Gul e Shah Rose Pink | MPKV     |
| Gulsa Red            | MPKV     |
| HP Collec.           | Shimala  |
| IC-318712            | NRCP     |
| IIHR 12/1            | IIHR     |
| IIHR 19/10           | IIHR     |
| Jalore Red           | CAZRI    |
| Jalore Seedless      | CAZRI    |
| Jodhpur coll.        | CAZRI    |
| Jodhpur Red          | CAZRI    |
| Jyoti                | MPKV     |
| Kabul                | MPKV     |
| Kabul Kohinoor       | MPKV     |

|                 |          |
|-----------------|----------|
| Kajaki Anar     | RBS      |
| Kalisirin       | NBPGR-ND |
| Kandhari        | CCSHAU   |
| Khog            | NBPGR-ND |
| Kurvi           | NBPGR-JR |
| Malta           | MPKV     |
| MR 599          | NBPGR-ND |
| Mridula         | MPKV     |
| Muskat          | MPKV     |
| P-13            | MPKV     |
| P-21            | MPKV     |
| P-23            | MPKV     |
| P-26            | MPKV     |
| Patna-5         | MPKV     |
| Phule Arakta    | MPKV     |
| Ruby            | IIHR     |
| Saharanpur      | RBS      |
| Saih Sirin      | MPKV     |
| Sirin           | NBPGR-ND |
| Speen Danedar   | MPKV     |
| Speen Sacarin   | MPKV     |
| Sur Sukker      | MPKV     |
| Surat Anar      | MPKV     |
| Surkh Anar      | MPKV     |
| Tebest          | MPKV     |
| Tujetis EC 4347 | NBPGR-JR |
| Uthkal          | MPKV     |
| Yercaud         | MPKV     |
| Yercaud Local   | MPKV     |

\* BHU: Banaras Hindu University; Varanashi, Uttar Pradesh. CAZRI: Central Arid Zone Research Institute (ICAR); Jodhpur, Rajasthan. CIAH-BR: Central Institute for Arid Horticulture (ICAR); Bikaner, Rajasthan. CIAH-VR: Central Institute for Arid Horticulture (ICAR); Central Horticultural Experiment Station, Vejalpur, Gujarat. CSAU: Chaudhary Charan Singh Haryana Agricultural University; Hisar, Haryana. IIHR: Indian Institute of Horticultural Research (ICAR); Bengaluru, Karnataka. MPKV: Mahatma Phule Krishi Vidyapeeth; Rahuri, Maharashtra. NBPGR: National Bureau of Plant Genetic Resources (ICAR); New Delhi. NBPGR-JR: National Bureau of Plant Genetic Resources (ICAR); Jodhpur, Rajasthan. NRCP: National Research Centre on Pomegranate (ICAR); Solapur, Maharashtra. RBS: Raja Balwant Singh College; Agra, Uttar Pradesh. Shimla, Himachal Pradesh.

**Supplementary Table S2.** Two-way analysis of variance for the percentage of infested leaves.

| Source of variation | df | Sum of squares | Mean squares | F value | P value   |
|---------------------|----|----------------|--------------|---------|-----------|
| Growing season (GS) | 1  | 15             | 14.7         | 4.193   | 0.0436*   |
| Accession (A)       | 21 | 34003          | 1619.2       | 462.875 | <0.001*** |
| GS × A              | 21 | 6              | 0.3          | 0.085   | >0.05     |
| Residuals           | 88 | 308            | 3.5          |         |           |
